# Supplementary material for: Influence of Stirring Parameters on Creaminess of Spring Blossom Honey Measured by Crystal Size, Whiteness Index and Mouthfeel
Source: MDPI journal article supplement (doi:10.3390/foods12010048), 2022-12-22
Supplement: s1 [file s1]

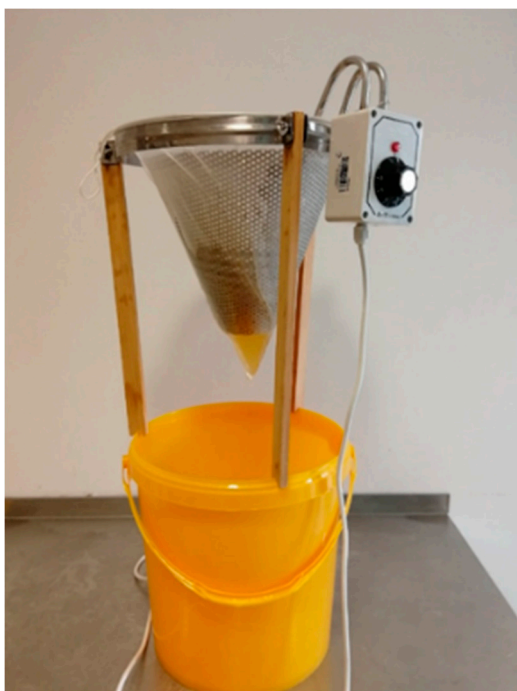

**Figure S3.** Prepreparation of the honey before stirring by conic pointed sieve (mesh size 200  $\mu\text{m}$ ) and heating coil.
