# Supplementary material for: Influence of Stirring Parameters on Creaminess of Spring Blossom Honey Measured by Crystal Size, Whiteness Index and Mouthfeel
Source: MDPI journal article supplement (doi:10.3390/foods12010048), 2022-12-22
Supplement: s1 [file s1]

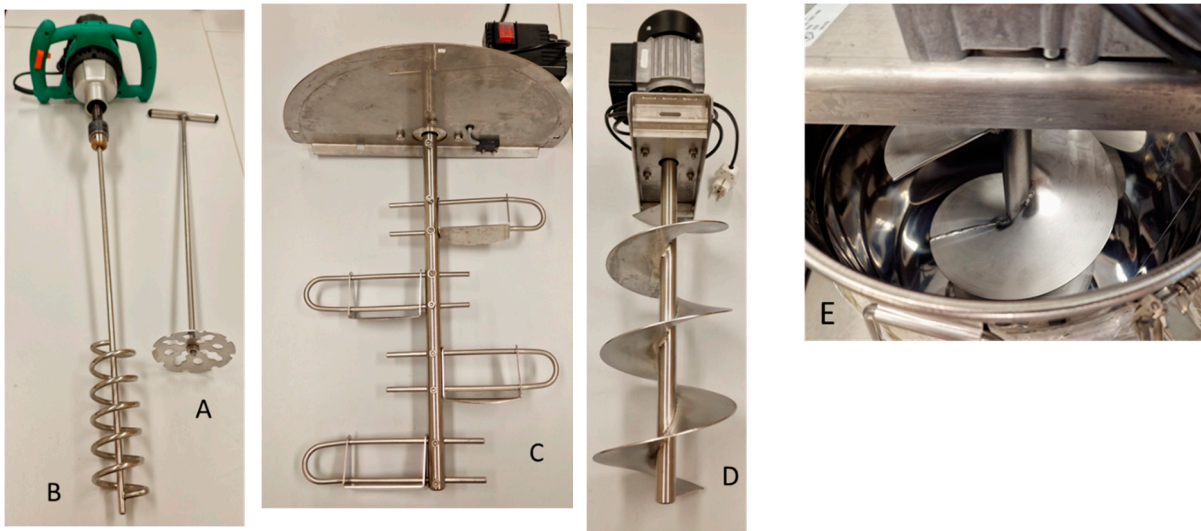

**Figure S2.** Stirring devices. A Manual stirrer for use in a bucket. B Stirring spiral for use in a bucket. C Stirring impeller outside of the stirring machine. D Stirring screw outside of the stirring machine. E Stirring screw in the stirring machine.
