# Supplementary material for: Influence of Stirring Parameters on Creaminess of Spring Blossom Honey Measured by Crystal Size, Whiteness Index and Mouthfeel
Source: MDPI journal article supplement (doi:10.3390/foods12010048), 2022-12-22
Supplement: s1 [file s1]

Table S1: Significance analysis of the findings (Student-Newman-Keuls procedure)

(a) Difference of the size of the 10 largest crystals in honey stirred with different stirring devices 3 days after stirring end

| Stirring device   | Stirring screw           | Stirring impeller        | Stirring spiral          | Manual stirring          |
|-------------------|--------------------------|--------------------------|--------------------------|--------------------------|
| Not stirred       | sig. ( $\alpha = 0.05$ ) | -                        | -                        | sig. ( $\alpha = 0.05$ ) |
| Stirring screw    |                          | sig. ( $\alpha = 0.05$ ) | sig. ( $\alpha = 0.05$ ) | -                        |
| Stirring impeller |                          |                          | -                        | sig. ( $\alpha = 0.05$ ) |
| Stirring spiral   |                          |                          |                          | sig. ( $\alpha = 0.05$ ) |

(b) Difference of the size of the 10 largest crystals in honey stirred with different stirring devices 7 days after stirring end

| Stirring device   | Stirring screw | Stirring impeller | Stirring spiral | Manual stirring |
|-------------------|----------------|-------------------|-----------------|-----------------|
| Not stirred       | -              | -                 | -               | -               |
| Stirring screw    |                | -                 | -               | -               |
| Stirring impeller |                |                   | -               | -               |
| Stirring spiral   |                |                   |                 | -               |

(c) Difference of the size of the 10 largest crystals in honey stirred with different stirring devices 14 days after stirring end

| Stirring device   | Stirring screw | Stirring impeller | Stirring spiral | Manual stirring |
|-------------------|----------------|-------------------|-----------------|-----------------|
| Not stirred       | -              | -                 | -               | -               |
| Stirring screw    |                | -                 | -               | -               |
| Stirring impeller |                |                   | -               | -               |
| Stirring spiral   |                |                   |                 | -               |

(d) Difference of the size of the 10 largest crystals in honey stirred with different stirring devices 56 days after stirring end

| Stirring device   | Stirring screw | Stirring impeller | Stirring spiral | Manual stirring |
|-------------------|----------------|-------------------|-----------------|-----------------|
| Not stirred       | -              | -                 | -               | -               |
| Stirring screw    |                | -                 | -               | -               |
| Stirring impeller |                |                   | -               | -               |
| Stirring spiral   |                |                   |                 | -               |

(e) Difference of the whiteness index of honey stirred with different stirring devices at stirring end

| Stirring device   | Stirring screw           | Stirring impeller        | Stirring spiral          | Manual stirring          |
|-------------------|--------------------------|--------------------------|--------------------------|--------------------------|
| Not stirred       | sig. ( $\alpha = 0.05$ ) |
| Stirring screw    |                          | -                        | -                        | -                        |
| Stirring impeller |                          |                          | -                        | -                        |
| Stirring spiral   |                          |                          |                          | -                        |

(f) Difference of the whiteness index of honey stirred with different stirring devices 3 days after stirring end

| Stirring device   | Stirring screw           | Stirring impeller        | Stirring spiral          | Manual stirring          |
|-------------------|--------------------------|--------------------------|--------------------------|--------------------------|
| Not stirred       | sig. ( $\alpha = 0.05$ ) |
| Stirring screw    |                          | sig. ( $\alpha = 0.05$ ) | sig. ( $\alpha = 0.05$ ) | -                        |
| Stirring impeller |                          |                          | -                        | -                        |
| Stirring spiral   |                          |                          |                          | -                        |

(g) Difference of the whiteness index of honey stirred with different stirring devices 7 days after stirring end

| Stirring device   | Stirring screw | Stirring impeller | Stirring spiral | Manual stirring |
|-------------------|----------------|-------------------|-----------------|-----------------|
| Not stirred       | -              | -                 | -               | -               |
| Stirring screw    |                | -                 | -               | -               |
| Stirring impeller |                |                   | -               | -               |
| Stirring spiral   |                |                   |                 | -               |

(h) Difference of the whiteness index of honey stirred with different stirring devices 14 days after stirring end

| Stirring device   | Stirring screw | Stirring impeller | Stirring spiral | Manual stirring |
|-------------------|----------------|-------------------|-----------------|-----------------|
| Not stirred       | -              | -                 | -               | -               |
| Stirring screw    |                | -                 | -               | -               |
| Stirring impeller |                |                   | -               | -               |
| Stirring spiral   |                |                   |                 | -               |

(i) difference of the whiteness index of honey stirred with different stirring devices 56 days after stirring end

| Stirring device   | Stirring screw           | Stirring impeller        | Stirring spiral          | Manual stirring          |
|-------------------|--------------------------|--------------------------|--------------------------|--------------------------|
| Not stirred       | sig. ( $\alpha = 0.05$ ) | sig. ( $\alpha = 0.05$ ) | -                        | sig. ( $\alpha = 0.05$ ) |
| Stirring screw    |                          | sig. ( $\alpha = 0.05$ ) | sig. ( $\alpha = 0.05$ ) | sig. ( $\alpha = 0.05$ ) |
| Stirring impeller |                          |                          | sig. ( $\alpha = 0.05$ ) | -                        |
| Stirring spiral   |                          |                          |                          | sig. ( $\alpha = 0.05$ ) |

(j) Difference of the size of the 10 largest crystals in honey pretreated with different methods on stirring day 1

|                        |                          |                           |
|------------------------|--------------------------|---------------------------|
| Pretreatment           | Sieve, no heating coil   | No sieve, no heating coil |
| Sieve & heating coil   | sig. ( $\alpha = 0.05$ ) | sig. ( $\alpha = 0.05$ )  |
| Sieve, no heating coil |                          | -                         |

(k) Difference of the size of the 10 largest crystals in honey pretreated with different methods on stirring day 5

|                        |                          |                           |
|------------------------|--------------------------|---------------------------|
| Pretreatment           | Sieve, no heating coil   | No sieve, no heating coil |
| Sieve & heating coil   | sig. ( $\alpha = 0.05$ ) | sig. ( $\alpha = 0.05$ )  |
| Sieve, no heating coil |                          | -                         |

(l) Difference of the size of the 10 largest crystals in honey pretreated with different methods 7 days after stirring end

|                        |                          |                           |
|------------------------|--------------------------|---------------------------|
| Pretreatment           | Sieve, no heating coil   | No sieve, no heating coil |
| Sieve & heating coil   | sig. ( $\alpha = 0.05$ ) | sig. ( $\alpha = 0.05$ )  |
| Sieve, no heating coil |                          | sig. ( $\alpha = 0.05$ )  |

(m) Difference of the size of the 10 largest crystals in honey pretreated with different methods 14 days after stirring end

|                        |                          |                           |
|------------------------|--------------------------|---------------------------|
| Pretreatment           | Sieve, no heating coil   | No sieve, no heating coil |
| Sieve & heating coil   | sig. ( $\alpha = 0.05$ ) | sig. ( $\alpha = 0.05$ )  |
| Sieve, no heating coil |                          | sig. ( $\alpha = 0.05$ )  |

(n) difference of the size of the 10 largest crystals in honey pretreated with different methods 28 days after stirring end

|                        |                          |                           |
|------------------------|--------------------------|---------------------------|
| Pretreatment           | Sieve, no heating coil   | No sieve, no heating coil |
| Sieve & heating coil   | sig. ( $\alpha = 0.05$ ) | sig. ( $\alpha = 0.05$ )  |
| Sieve, no heating coil |                          | -                         |

(o) Difference of the whiteness index of honey pretreated with different methods on stirring day 1

| Pretreatment           | Sieve, no heating coil | No sieve, no heating coil |
|------------------------|------------------------|---------------------------|
| Sieve & heating coil   | -                      | -                         |
| Sieve, no heating coil |                        | -                         |

(p) Difference of the whiteness index of honey pretreated with different methods on stirring day 5

| Pretreatment           | Sieve, no heating coil | No sieve, no heating coil |
|------------------------|------------------------|---------------------------|
| Sieve & heating coil   | -                      | -                         |
| Sieve, no heating coil |                        | -                         |

(q) Difference of the whiteness index of honey pretreated with different methods 7 days after stirring end

| Pretreatment           | Sieve, no heating coil | No sieve, no heating coil |
|------------------------|------------------------|---------------------------|
| Sieve & heating coil   | -                      | sig. ( $\alpha = 0.05$ )  |
| Sieve, no heating coil |                        | sig. ( $\alpha = 0.05$ )  |

(r) Difference of the whiteness index of honey pretreated with different methods 14 days after stirring end

| Pretreatment           | Sieve, no heating coil | No sieve, no heating coil |
|------------------------|------------------------|---------------------------|
| Sieve & heating coil   | -                      | sig. ( $\alpha = 0.05$ )  |
| Sieve, no heating coil |                        | sig. ( $\alpha = 0.05$ )  |

(s) Difference of the whiteness index of honey pretreated with different methods 28 days after stirring end

| Pretreatment           | Sieve, no heating coil | No sieve, no heating coil |
|------------------------|------------------------|---------------------------|
| Sieve & heating coil   | -                      | -                         |
| Sieve, no heating coil |                        | -                         |

(t) Difference of the size of the 10 largest crystals in honey stirred at different temperatures and pre-treated with different seeding at stirring end

| Stirring temp. and seeding | 14 °C with seed honey | 18 °C no seed honey      | 18 °C with seed honey    | Room temp. no seed honey |
|----------------------------|-----------------------|--------------------------|--------------------------|--------------------------|
| 14 °C no seed honey        | -                     | sig. ( $\alpha = 0.05$ ) | -                        | sig. ( $\alpha = 0.05$ ) |
| 14 °C with seed honey      |                       | sig. ( $\alpha = 0.05$ ) | -                        | sig. ( $\alpha = 0.05$ ) |
| 18 °C no seed honey        |                       |                          | sig. ( $\alpha = 0.05$ ) | sig. ( $\alpha = 0.05$ ) |
| 18 °C with seed honey      |                       |                          |                          | sig. ( $\alpha = 0.05$ ) |

(u) Difference of the size of the 10 largest crystals in honey stirred at different temperatures and pre-treated with different seeding 14 days after stirring end

| Stirring temp. and seeding | 14 °C with seed honey    | 18 °C no seed honey      | 18 °C with seed honey    | Room temp. no seed honey |
|----------------------------|--------------------------|--------------------------|--------------------------|--------------------------|
| 14 °C no seed honey        | sig. ( $\alpha = 0.05$ ) |
| 14 °C with seed honey      |                          | sig. ( $\alpha = 0.05$ ) | sig. ( $\alpha = 0.05$ ) | sig. ( $\alpha = 0.05$ ) |
| 18 °C no seed honey        |                          |                          | sig. ( $\alpha = 0.05$ ) | sig. ( $\alpha = 0.05$ ) |
| 18 °C with seed honey      |                          |                          |                          | sig. ( $\alpha = 0.05$ ) |

(v) Difference of the size of the 10 largest crystals in honey stirred at different temperatures and pre-treated with different seeding 28 days after stirring end

| Stirring temp. and seeding | 14 °C with seed honey | 18 °C no seed honey | 18 °C with seed honey    | Room temp. no seed honey |
|----------------------------|-----------------------|---------------------|--------------------------|--------------------------|
| 14 °C no seed honey        | -                     | -                   | sig. ( $\alpha = 0.05$ ) | sig. ( $\alpha = 0.05$ ) |
| 14 °C with seed honey      |                       | -                   | sig. ( $\alpha = 0.05$ ) | sig. ( $\alpha = 0.05$ ) |
| 18 °C no seed honey        |                       |                     | sig. ( $\alpha = 0.05$ ) | sig. ( $\alpha = 0.05$ ) |
| 18 °C with seed honey      |                       |                     |                          | sig. ( $\alpha = 0.05$ ) |

(w) Difference of the whiteness index of honey stirred at different temperatures and pre-treated with different seeding at the end of the stirring process

| Stirring temp. and seeding | 14 °C with seed honey    | 18 °C no seed honey      | 18 °C with seed honey    | Room temp. no seed honey |
|----------------------------|--------------------------|--------------------------|--------------------------|--------------------------|
| 14 °C no seed honey        | sig. ( $\alpha = 0.05$ ) |
| 14 °C with seed honey      |                          | sig. ( $\alpha = 0.05$ ) | -                        | sig. ( $\alpha = 0.05$ ) |
| 18 °C no seed honey        |                          |                          | sig. ( $\alpha = 0.05$ ) | sig. ( $\alpha = 0.05$ ) |
| 18 °C with seed honey      |                          |                          |                          | sig. ( $\alpha = 0.05$ ) |

(x) Difference of the whiteness index of honey stirred at different temperatures and pre-treated with different seeding 14 days after stirring end

| Stirring temp. and seeding | 14 °C with seed honey | 18 °C no seed honey      | 18 °C with seed honey    | Room temp. no seed honey |
|----------------------------|-----------------------|--------------------------|--------------------------|--------------------------|
| 14 °C no seed honey        | -                     | sig. ( $\alpha = 0.05$ ) | sig. ( $\alpha = 0.05$ ) | sig. ( $\alpha = 0.05$ ) |
| 14 °C with seed honey      |                       | sig. ( $\alpha = 0.05$ ) | sig. ( $\alpha = 0.05$ ) | sig. ( $\alpha = 0.05$ ) |
| 18 °C no seed honey        |                       |                          | -                        | sig. ( $\alpha = 0.05$ ) |
| 18 °C with seed honey      |                       |                          |                          | sig. ( $\alpha = 0.05$ ) |

(y) Difference of the whiteness index of honey stirred at different temperatures and pre-treated with different seeding 28 days after stirring end

| Stirring temp. and seeding | 14 °C with seed honey    | 18 °C no seed honey      | 18 °C with seed honey    | Room temp. no seed honey |
|----------------------------|--------------------------|--------------------------|--------------------------|--------------------------|
| 14 °C no seed honey        | sig. ( $\alpha = 0.05$ ) |
| 14 °C with seed honey      |                          | sig. ( $\alpha = 0.05$ ) | sig. ( $\alpha = 0.05$ ) | sig. ( $\alpha = 0.05$ ) |
| 18 °C no seed honey        |                          |                          | sig. ( $\alpha = 0.05$ ) | sig. ( $\alpha = 0.05$ ) |
| 18 °C with seed honey      |                          |                          |                          | sig. ( $\alpha = 0.05$ ) |

(z) Difference of the size of the 10 largest crystals in honey stirred in different intervals at stirring end

| Stirring interval      | Daily twice<br>37,5min | Daily 4 times<br>18,3 min | Daily 6 times<br>12,5 min | Daily 24 times<br>3,1 min |
|------------------------|------------------------|---------------------------|---------------------------|---------------------------|
| Daily once 75 min      | -                      | -                         | -                         | -                         |
| Daily twice 37,5min    |                        | -                         | -                         | -                         |
| Daily 4 times 18,3 min |                        |                           | -                         | -                         |
| Daily 6 times 12,5 min |                        |                           |                           | -                         |

(aa) difference of the whiteness index of honey stirred in different intervals at stirring end

| Stirring interval      | Daily twice<br>37,5min | Daily 4 times<br>18,3 min | Daily 6 times<br>12,5 min | Daily 24 times<br>3,1 min |
|------------------------|------------------------|---------------------------|---------------------------|---------------------------|
| Daily once 75 min      | -                      | -                         | sig. ( $\alpha = 0.05$ )  | sig. ( $\alpha = 0.05$ )  |
| Daily twice 37,5min    |                        | -                         | sig. ( $\alpha = 0.05$ )  | sig. ( $\alpha = 0.05$ )  |
| Daily 4 times 18,3 min |                        |                           | -                         | sig. ( $\alpha = 0.05$ )  |
| Daily 6 times 12,5 min |                        |                           |                           | sig. ( $\alpha = 0.05$ )  |

(ab) difference of the whiteness index of honey stirred in different intervals 23 days after stirring end

| Stirring interval      | Daily twice<br>37,5min | Daily 4 times<br>18,3 min | Daily 6 times<br>12,5 min | Daily 24 times<br>3,1 min |
|------------------------|------------------------|---------------------------|---------------------------|---------------------------|
| Daily once 75 min      | -                      | -                         | -                         | -                         |
| Daily twice 37,5min    |                        | -                         | -                         | -                         |
| Daily 4 times 18,3 min |                        |                           | -                         | -                         |
| Daily 6 times 12,5 min |                        |                           |                           | -                         |

(ac) Difference of the size of the 10 largest crystals in honey stirred in different durations at the end of stirring

| Stirring time     | Daily once 15 min | Daily twice 1 min        | Daily twice 5 min        | Daily twice 15 min       |
|-------------------|-------------------|--------------------------|--------------------------|--------------------------|
| Daily once 1 min  | -                 | sig. ( $\alpha = 0.05$ ) | -                        | sig. ( $\alpha = 0.05$ ) |
| Daily once 15 min |                   | sig. ( $\alpha = 0.05$ ) | -                        | sig. ( $\alpha = 0.05$ ) |
| Daily twice 1 min |                   |                          | sig. ( $\alpha = 0.05$ ) | sig. ( $\alpha = 0.05$ ) |
| Daily twice 5 min |                   |                          |                          | sig. ( $\alpha = 0.05$ ) |

(ad) Difference of the size of the 10 largest crystals in honey stirred in different durations 30 days after stirring end

| Stirring time     | Daily once 15 min | Daily twice 1 min | Daily twice 5 min | Daily twice 15 min       |
|-------------------|-------------------|-------------------|-------------------|--------------------------|
| Daily once 1 min  | -                 | -                 | -                 | sig. ( $\alpha = 0.05$ ) |
| Daily once 15 min |                   | -                 | -                 | sig. ( $\alpha = 0.05$ ) |
| Daily twice 1 min |                   |                   | -                 | -                        |
| Daily twice 5 min |                   |                   |                   | sig. ( $\alpha = 0.05$ ) |



(ae) Difference of the whiteness index of honey stirred in different durations at the end of stirring

| Stirring time     | Daily once 15 min        | Daily twice 1 min        | Daily twice 5 min        | Daily twice 15 min       |
|-------------------|--------------------------|--------------------------|--------------------------|--------------------------|
| Daily once 1 min  | sig. ( $\alpha = 0.05$ ) | -                        | -                        | sig. ( $\alpha = 0.05$ ) |
| Daily once 15 min |                          | sig. ( $\alpha = 0.05$ ) | sig. ( $\alpha = 0.05$ ) | sig. ( $\alpha = 0.05$ ) |
| Daily twice 1 min |                          |                          | -                        | sig. ( $\alpha = 0.05$ ) |
| Daily twice 5 min |                          |                          |                          | sig. ( $\alpha = 0.05$ ) |

(af) Difference of the whiteness index of honey stirred in different durations 8 days after stirring

| Stirring time     | Daily once 15 min | Daily twice 1 min | Daily twice 5 min | Daily twice 15 min       |
|-------------------|-------------------|-------------------|-------------------|--------------------------|
| Daily once 1 min  | -                 | -                 | -                 | -                        |
| Daily once 15 min |                   | -                 | -                 | sig. ( $\alpha = 0.05$ ) |
| Daily twice 1 min |                   |                   | -                 | -                        |
| Daily twice 5 min |                   |                   |                   | -                        |
