# Supplementary material for: Influence of Stirring Parameters on Creaminess of Spring Blossom Honey Measured by Crystal Size, Whiteness Index and Mouthfeel
Source: MDPI journal article supplement (doi:10.3390/foods12010048), 2022-12-22
Supplement: s1 [file s1]

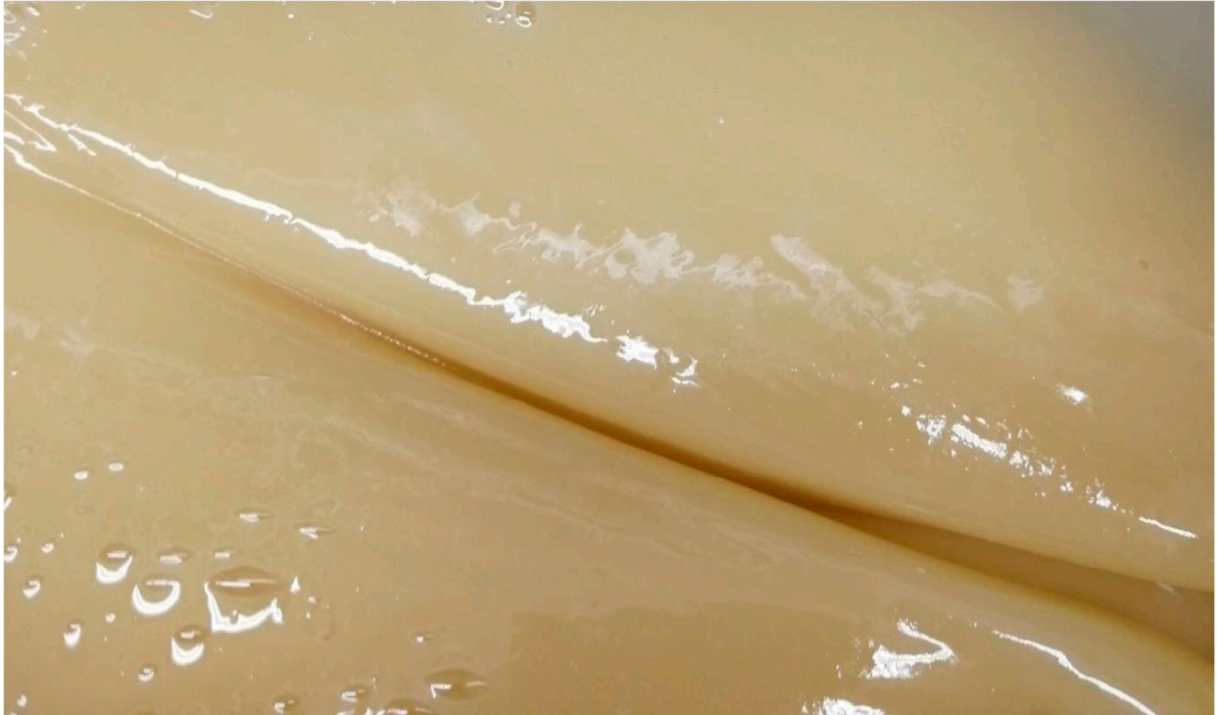

*Figure S1 Modified version of the “finger test” commonly used by beekeepers. A plastic tongue depressor dipped 2 cm deep into the honey and pulled 10 cm forms two honey walls. The walls touch each other for a distance of approx. 5 cm after 5 seconds.*
