# Supplementary material for: Influence of Stirring Parameters on Creaminess of Spring Blossom Honey Measured by Crystal Size, Whiteness Index and Mouthfeel
Source: Foods. 2022 Dec 22;12(1):48. doi: 10.3390/foods12010048 (PMC9818981; doi:10.3390/foods12010048)
Supplement: Supplementary file 1 [file foods-12-00048-s001.zip]

Archive with 4 entries (4 files):
- Supplementary_information_figure_S1.pdf
- Supplementary_information_figure_S2.pdf
- Supplementary_information_figure_S3.pdf
- supplementary_information_table_S1_Significance_analysis_of_the_findings.pdf
